# Supplementary material
Source: Copernicus journal article supplement (doi:10.5194/asr-23-1-2026)
Supplement: Supplementary file 1 [file asr-23-1-2026-supplement.pdf]

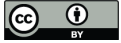

*Supplement of*

## **Which forecast errors matter most? Assessing public priorities in weather forecast accuracy**

**Christoph Sauter and Kathrin Wapler**

*Correspondence to:* Christoph Sauter ([christoph.sauter@dwd.de](mailto:christoph.sauter@dwd.de))

The copyright of individual parts of the supplement might differ from the article licence.

Table S 1: Complete description of the cases used in the two surveys

| Case                                                                                                                                  | Illustrations                                                                       | Original text (German)                                                                                                                                                                                                                                                                                                                                                                                                                                                                                                                                                                                                                                                                                                                                                                                                                                                                                                          | English translation [incl. extra context]                                                                                                                                                                                                                                                                                                                                                                                                                                                                                                                                                                                                                                                                                                                                                                                                                                                                                                                                                                   |
|---------------------------------------------------------------------------------------------------------------------------------------|-------------------------------------------------------------------------------------|---------------------------------------------------------------------------------------------------------------------------------------------------------------------------------------------------------------------------------------------------------------------------------------------------------------------------------------------------------------------------------------------------------------------------------------------------------------------------------------------------------------------------------------------------------------------------------------------------------------------------------------------------------------------------------------------------------------------------------------------------------------------------------------------------------------------------------------------------------------------------------------------------------------------------------|-------------------------------------------------------------------------------------------------------------------------------------------------------------------------------------------------------------------------------------------------------------------------------------------------------------------------------------------------------------------------------------------------------------------------------------------------------------------------------------------------------------------------------------------------------------------------------------------------------------------------------------------------------------------------------------------------------------------------------------------------------------------------------------------------------------------------------------------------------------------------------------------------------------------------------------------------------------------------------------------------------------|
| <p>Case A</p> <p>- An event that was forecast for the participants location, however, ended up occurring at a different location.</p> | 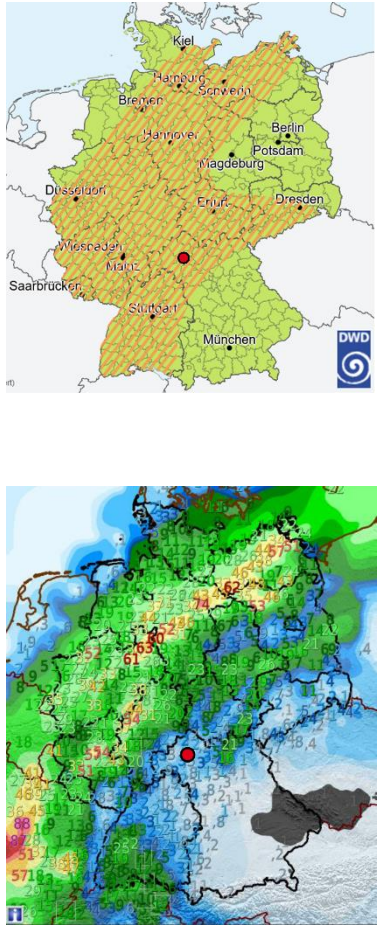  | <p><b>Es ist der 30. April: Sie sehen die Vorhersage für den 1. Mai (Folgetag)</b></p> <ul style="list-style-type: none"> <li>• Für den freien Tag am 1. Mai planen Sie eine Radtour im Spessart (roter Punkt).</li> <li>• Am 30. April werden für den Folgetag jedoch heftiger Starkregen und schwere Sturmböen vorhergesagt.</li> <li>• Aufgrund der Vorhersage sagen Sie Ihre Tour ab.</li> </ul> <p><b>So war das Wetter am 1. Mai tatsächlich:</b></p> <ul style="list-style-type: none"> <li>• Das Unwetter zieht weiter nördlich als ursprünglich gedacht vorbei. Im Spessart bleibt es aber so gut wie trocken.</li> <li>• Die Karte [...] zeigt die Messungen: Rote Flächen und Zahlen zeigen Orte mit besonders viel Niederschlag. In einigen Orten kommt es zu zahlreichen umgestürzten Bäumen und Überschwemmungen.</li> </ul> <p><b>Fazit: Das Gewitter fand an einem anderen Ort statt, als vorhergesagt!</b></p> | <p><b>It's April 30<sup>th</sup>: You are looking at the forecast for May 1<sup>st</sup> (the next day)</b></p> <ul style="list-style-type: none"> <li>• For your day off on May 1<sup>st</sup> [a German national holiday], you're planning a bicycle tour in the Spessart region (red dot).</li> <li>• However, on April 30<sup>th</sup>, heavy rain and strong gusts are forecast for the next day.</li> <li>• Due to the forecast, you cancel your tour.</li> </ul> <p><b>This is what the weather was actually like on May 1<sup>st</sup>:</b></p> <ul style="list-style-type: none"> <li>• The storm passes further north than initially thought. The Spessart region remains almost completely dry.</li> <li>• The map [...] shows the observations: red areas and numbers indicate places with particularly high precipitation. In some places there are numerous uprooted trees and floods.</li> </ul> <p><b>Conclusion: The thunderstorm occurred at a different location than predicted!</b></p> |
| <p>Case B</p> <p>- An event that was forecast for a different location, however, ended up occurring at the participants location.</p> |  | <p><b>Es ist Donnerstag: Sie sehen die Vorhersage für Freitag (Folgetag)</b></p> <ul style="list-style-type: none"> <li>• Sie planen einen schönen Nachmittag im Park (roter Punkt) mit Picknick.</li> <li>• Zur Sicherheit schauen Sie nochmal in Ihre DWD-WarnWetter-App: In Ihrem Ort soll die Sonne scheinen. Nur knapp südlich von Ihnen wird vor Gewitter mit starkem Regen gewarnt.</li> <li>• Da Sie nicht betroffen sind, halten Sie an Ihrem Plan fürs Picknick fest.</li> </ul>                                                                                                                                                                                                                                                                                                                                                                                                                                      | <p><b>It's Thursday: You are looking at the forecast for Friday (the next day)</b></p> <ul style="list-style-type: none"> <li>• You're planning a nice picnic afternoon in the park (red dot).</li> <li>• To be safe, you check your DWD WarnWetter app [mobile app by DWD that provides weather warnings and information] again: In your area, it is supposed to be sunny. There's a warning for a thunderstorm with heavy rain, but it's a bit south of your place.</li> </ul>                                                                                                                                                                                                                                                                                                                                                                                                                                                                                                                            |

|                                                                                |                                                                                                                                                                               |                                                                                                                                                                                                                                                                                                                                                                                                                                                                                                                                                                                                                                                                                                                                                                                                                                       |                                                                                                                                                                                                                                                                                                                                                                                                                                                                                                                                                                                                                                                                                                                                                                                                                                                                                          |
|--------------------------------------------------------------------------------|-------------------------------------------------------------------------------------------------------------------------------------------------------------------------------|---------------------------------------------------------------------------------------------------------------------------------------------------------------------------------------------------------------------------------------------------------------------------------------------------------------------------------------------------------------------------------------------------------------------------------------------------------------------------------------------------------------------------------------------------------------------------------------------------------------------------------------------------------------------------------------------------------------------------------------------------------------------------------------------------------------------------------------|------------------------------------------------------------------------------------------------------------------------------------------------------------------------------------------------------------------------------------------------------------------------------------------------------------------------------------------------------------------------------------------------------------------------------------------------------------------------------------------------------------------------------------------------------------------------------------------------------------------------------------------------------------------------------------------------------------------------------------------------------------------------------------------------------------------------------------------------------------------------------------------|
|                                                                                | 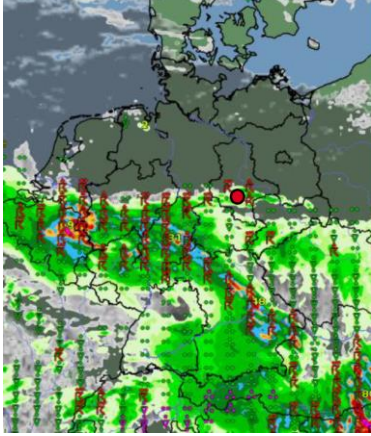                                                                                             | <p><b>So war das Wetter am Freitag tatsächlich:</b></p> <ul style="list-style-type: none"> <li>• Als Sie im Park sitzen, sehen Sie dunkle Wolken auf sich zukommen. Sie bleiben aber weiterhin sitzen. Sie vertrauen schließlich auf die Vorhersage.</li> <li>• Allerdings fängt es dann doch stark an zu regnen. Sie sehen den ersten Blitz, packen schnell alles zusammen und laufen nach Hause.</li> </ul> <p><b>Fazit: Das Gewitter fand an einem anderen Ort statt, als vorhergesagt!</b></p>                                                                                                                                                                                                                                                                                                                                    | <ul style="list-style-type: none"> <li>• Since you're not affected, you stick to your picnic plans.</li> </ul> <p><b>This is what the weather was actually like on Friday:</b></p> <ul style="list-style-type: none"> <li>• As you're sitting in the park, you see dark clouds approaching. However, you stay where you are, trusting the forecast.</li> <li>• However, a little later it does start raining heavily. You see the first lightning, quickly pack everything up, and go home.</li> </ul> <p><b>Conclusion: The thunderstorm occurred at a different location than predicted!</b></p>                                                                                                                                                                                                                                                                                       |
| <p>Case C<br/>- An event that occurred later in time than in the forecast.</p> | <br><br> | <p><b>Es ist Mittwoch: Sie sehen die Vorhersage für Himmelfahrt (Folgetag)</b></p> <ul style="list-style-type: none"> <li>• Sie planen mit Ihrer Familie einen Ausflug in den Waldzoo (roter Punkt) – schließlich ist Feiertag!</li> <li>• Zur Sicherheit sehen Sie vorher nochmal in Ihrer DWD-WarnWetter-App nach. Leider soll es bereits ab dem Nachmittag regnen.</li> <li>• Das könnte für einen Besuch im Zoo zu knapp werden. Sie entschließen sich daher lieber zuhause zu bleiben.</li> </ul> <p><b>So war das Wetter an Himmelfahrt tatsächlich:</b></p> <ul style="list-style-type: none"> <li>• Den ganzen Tag scheint die Sonne. Erst am frühen Abend fängt es an zu regnen.</li> <li>• Sie hätten also doch den Tag im Waldzoo verbringen können. Aufgrund der Vorhersage sind Sie jedoch zuhause geblieben.</li> </ul> | <p><b>It's Wednesday: You are looking at the forecast for Ascension Day (the next day)</b></p> <ul style="list-style-type: none"> <li>• You're planning a trip to the forest zoo (red dot) with your family - after all, it's a holiday!</li> <li>• To be safe, you check your DWD WarnWetter app [<i>mobile app by DWD that provides weather warnings and information</i>] again. Unfortunately, it's supposed to start raining in the afternoon.</li> <li>• This probably isn't enough time for a visit to the zoo. You decide to stay home instead.</li> </ul> <p><b>This is what the weather was actually like on Ascension Day:</b></p> <ul style="list-style-type: none"> <li>• It's sunny all day. It only starts raining in the early evening.</li> <li>• You could have spent the day at the forest zoo after all. However, due to the forecast, you stayed at home.</li> </ul> |

|                                                                                        |                                                                                     |                                                                                                                                                                                                                                                                                                                                                                                                                                                                                                                                                                                                                                                                                                                                                                                                                                                                                                                                                                                             |                                                                                                                                                                                                                                                                                                                                                                                                                                                                                                                                                                                                                                                                                                                                                                                                                                                                                                                                                                                                                                |
|----------------------------------------------------------------------------------------|-------------------------------------------------------------------------------------|---------------------------------------------------------------------------------------------------------------------------------------------------------------------------------------------------------------------------------------------------------------------------------------------------------------------------------------------------------------------------------------------------------------------------------------------------------------------------------------------------------------------------------------------------------------------------------------------------------------------------------------------------------------------------------------------------------------------------------------------------------------------------------------------------------------------------------------------------------------------------------------------------------------------------------------------------------------------------------------------|--------------------------------------------------------------------------------------------------------------------------------------------------------------------------------------------------------------------------------------------------------------------------------------------------------------------------------------------------------------------------------------------------------------------------------------------------------------------------------------------------------------------------------------------------------------------------------------------------------------------------------------------------------------------------------------------------------------------------------------------------------------------------------------------------------------------------------------------------------------------------------------------------------------------------------------------------------------------------------------------------------------------------------|
|                                                                                        |                                                                                     | <p><b>Fazit: Es hat später angefangen zu regnen, als vorhergesagt!</b></p>                                                                                                                                                                                                                                                                                                                                                                                                                                                                                                                                                                                                                                                                                                                                                                                                                                                                                                                  | <p><b>Conclusion: It started raining later than predicted!</b></p>                                                                                                                                                                                                                                                                                                                                                                                                                                                                                                                                                                                                                                                                                                                                                                                                                                                                                                                                                             |
| <p>Case D<br/>-<br/>An event that occurred earlier in time than in the forecast.</p>   | 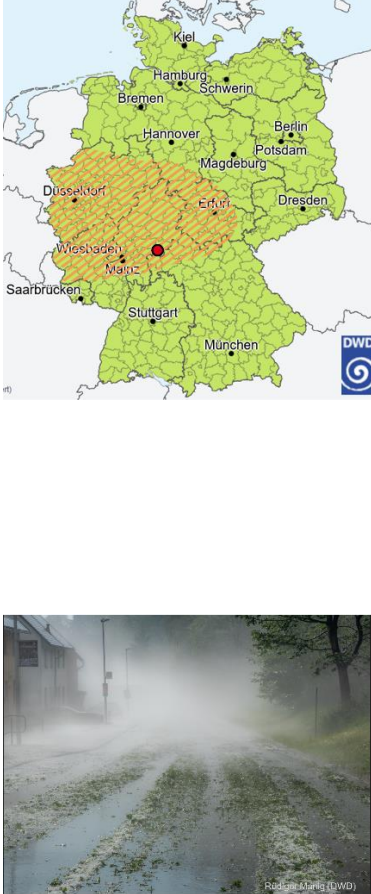  | <p><b>Es ist Freitag: Sie sehen die Vorhersage für Samstag (Folgetag)</b></p> <ul style="list-style-type: none"> <li>• Sie planen eine Wanderung im Taunus (roter Punkt).</li> <li>• Da der DWD Gewitter für den Nachmittag ab 14 Uhr vorhersagt, verschieben Sie Ihre Wanderung auf den Vormittag.</li> <li>• Um dennoch nicht zu früh aufstehen zu müssen und die Tour genießen zu können, planen Sie die Wanderung so, dass Sie spätestens um 14 Uhr wieder zurück am Auto sind.</li> </ul> <p><b>So war das Wetter am Samstag tatsächlich</b></p> <ul style="list-style-type: none"> <li>• Obwohl Sie rechtzeitig zurück zum Auto kommen, fängt es kurz vorher an in Strömen zu regnen und zu hageln.</li> <li>• Das Foto [...] zeigt Ihre letzten paar Meter bis zum Auto.</li> <li>• Auf dem Großen Feldberg im Taunus werden an diesem Tag 35 mm Regen gemessen. Außerdem fallen Hagelkörner (1 cm groß).</li> </ul> <p><b>Fazit: Das Gewitter kam früher, als vorhergesagt!</b></p> | <p><b>It's Friday: You are looking at the forecast for Saturday (the next day)</b></p> <ul style="list-style-type: none"> <li>• You're planning a hike in the Taunus Mountains (red dot).</li> <li>• Since DWD is predicting thunderstorms for the afternoon starting at 2 PM, you reschedule your hike for the morning.</li> <li>• To avoid having to get up too early and still enjoy the tour, you plan the hike so that you'll be back at your car by 2 PM at the latest.</li> </ul> <p><b>This is what the weather was actually like on Saturday:</b></p> <ul style="list-style-type: none"> <li>• Although you make it back to your car on time, it starts to rain and hail heavily just before you arrive.</li> <li>• The photo [...] shows the last few meters to the car.</li> <li>• On the Great Feldberg Mountain in the Taunus Mountains, 35 mm of rain is measured on this day. Additionally, there is hail (1 cm in size).</li> </ul> <p><b>Conclusion: The thunderstorm arrived earlier than predicted!</b></p> |
| <p>Case E<br/>-<br/>A thunderstorm that ended up much weaker than in the forecast.</p> |  | <p><b>Es ist Freitag: Sie sehen die Vorhersage für Sonntag (2-Tages-Vorhersage)</b></p> <ul style="list-style-type: none"> <li>• Sie haben eine Kanutour auf der Lahn (roter Punkt) geplant.</li> <li>• Jedoch werden für die Mitte und den Süden Deutschlands großflächig Gewitter vorhergesagt.</li> <li>• Vorsichtshalber sagen Sie die Tour ab. Ein bisschen Regen stört Sie nicht, aber in ein Unwetter möchten Sie wirklich nicht geraten.</li> </ul>                                                                                                                                                                                                                                                                                                                                                                                                                                                                                                                                 | <p><b>It's Friday: You are looking at the forecast for Sunday (2-day forecast)</b></p> <ul style="list-style-type: none"> <li>• You have planned a canoe tour on the Lahn River (red dot).</li> <li>• However, thunderstorms are predicted for the middle and south of Germany.</li> <li>• As a precaution, you cancel the tour. A little rain doesn't bother you, but you don't want to get caught in a storm.</li> </ul>                                                                                                                                                                                                                                                                                                                                                                                                                                                                                                                                                                                                     |

|                                                                                              |                                                                                                                                                                           |                                                                                                                                                                                                                                                                                                                                                                                                                                                                                                                                                                                                                                                                                                                                                                                                                                                                                                                                 |                                                                                                                                                                                                                                                                                                                                                                                                                                                                                                                                                                                                                                                                                                                                                                                                                                                                                                                    |
|----------------------------------------------------------------------------------------------|---------------------------------------------------------------------------------------------------------------------------------------------------------------------------|---------------------------------------------------------------------------------------------------------------------------------------------------------------------------------------------------------------------------------------------------------------------------------------------------------------------------------------------------------------------------------------------------------------------------------------------------------------------------------------------------------------------------------------------------------------------------------------------------------------------------------------------------------------------------------------------------------------------------------------------------------------------------------------------------------------------------------------------------------------------------------------------------------------------------------|--------------------------------------------------------------------------------------------------------------------------------------------------------------------------------------------------------------------------------------------------------------------------------------------------------------------------------------------------------------------------------------------------------------------------------------------------------------------------------------------------------------------------------------------------------------------------------------------------------------------------------------------------------------------------------------------------------------------------------------------------------------------------------------------------------------------------------------------------------------------------------------------------------------------|
|                                                                                              |                                                                                          | <p><b>So war das Wetter am Sonntag tatsächlich</b></p> <ul style="list-style-type: none"> <li>• Es gibt nur etwas Wind und leichten Regen.</li> <li>• Über den gesamten Tag werden weniger als 5 mm Regen gemessen.</li> <li>• Die Kanutour wäre problemlos möglich gewesen.</li> </ul>                                                                                                                                                                                                                                                                                                                                                                                                                                                                                                                                                                                                                                         | <p><b>This is what the weather was actually like on Sunday:</b></p> <ul style="list-style-type: none"> <li>• There's only a little bit of wind and light rain.</li> <li>• Less than 5 mm of rain is recorded throughout the day.</li> <li>• The canoe tour would have been possible without any problems.</li> </ul>                                                                                                                                                                                                                                                                                                                                                                                                                                                                                                                                                                                               |
| <p>Case F<br/>-<br/>A thunderstorm that ended up much more intense than in the forecast.</p> | <br> | <p><b>Es ist Freitag: Sie sehen die Vorhersage fürs Wochenende (1-2-Tage-Vorhersage)</b></p> <ul style="list-style-type: none"> <li>• Sie planen einen Campingausflug (roter Punkt). Für die Nacht von Samstag auf Sonntag wird leichter Regen vorhergesagt.</li> <li>• Davon lassen Sie sich nicht unterkriegen! Schließlich haben Sie ein gutes Zelt dabei. Außerdem wird für Samstag und Sonntag tagsüber Sonnenschein vorhergesagt.</li> </ul> <p><b>So war das Wetter am Wochenende tatsächlich:</b></p> <ul style="list-style-type: none"> <li>• In der Nacht von Samstag auf Sonntag stürmt es. Statt einem leichten Regen kommt ein starker Regen. Sie bekommen kaum ein Auge zu, weil Sie sich sorgen, ob das Zelt hält.</li> <li>• Als Sie aufwachen, sehen Sie, dass sich auf dem Zeltplatz große Pfützen gebildet haben. Ihre Sachen, die über Nacht im Vorzelt gelegen haben, sind komplett durchnässt.</li> </ul> | <p><b>It's Friday: You are looking at the forecast for the weekend (1–2-day forecast)</b></p> <ul style="list-style-type: none"> <li>• You're planning a camping trip (red dot). Light rain is predicted for the night from Saturday to Sunday.</li> <li>• You're not letting that stop you! After all, you have a good tent. Plus, sunshine is predicted for Saturday and Sunday during the day.</li> </ul> <p><b>This is what the weather was actually like on the weekend:</b></p> <ul style="list-style-type: none"> <li>• On the night from Saturday to Sunday, it's very stormy. Instead of light rain, there's heavy rain. You barely get any sleep because you're worried about whether the tent will hold up.</li> <li>• When you wake up, you see that large puddles have formed throughout the campsite. Your belongings, which were left in the vestibule overnight, are completely soaked.</li> </ul> |
|                                                                                              |                                                                                                                                                                           | <p><b>Fazit: Es hat stärker geregnet, als vorhergesagt!</b></p>                                                                                                                                                                                                                                                                                                                                                                                                                                                                                                                                                                                                                                                                                                                                                                                                                                                                 | <p><b>Conclusion: It rained more heavily than predicted!</b></p>                                                                                                                                                                                                                                                                                                                                                                                                                                                                                                                                                                                                                                                                                                                                                                                                                                                   |

|                                                                                                                                           |                                                                                                                                                                         |                                                                                                                                                                                                                                                                                                                                                                                                                                                                                                                                                                                                                                                                                                                                                                                                                                                                                                                                                                                                                    |                                                                                                                                                                                                                                                                                                                                                                                                                                                                                                                                                                                                                                                                                                                                                                                                                                                                                                                                                                                                                                     |
|-------------------------------------------------------------------------------------------------------------------------------------------|-------------------------------------------------------------------------------------------------------------------------------------------------------------------------|--------------------------------------------------------------------------------------------------------------------------------------------------------------------------------------------------------------------------------------------------------------------------------------------------------------------------------------------------------------------------------------------------------------------------------------------------------------------------------------------------------------------------------------------------------------------------------------------------------------------------------------------------------------------------------------------------------------------------------------------------------------------------------------------------------------------------------------------------------------------------------------------------------------------------------------------------------------------------------------------------------------------|-------------------------------------------------------------------------------------------------------------------------------------------------------------------------------------------------------------------------------------------------------------------------------------------------------------------------------------------------------------------------------------------------------------------------------------------------------------------------------------------------------------------------------------------------------------------------------------------------------------------------------------------------------------------------------------------------------------------------------------------------------------------------------------------------------------------------------------------------------------------------------------------------------------------------------------------------------------------------------------------------------------------------------------|
| <p>Case G</p> <p>- An intermittent rainfall event that was forecast to be persistent (i.e., with continuous rainfall without breaks).</p> | 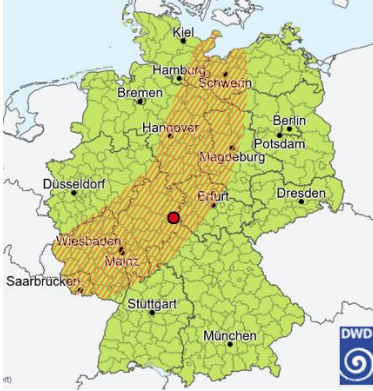<br> | <p><b>Es ist Mittwoch: Sie sehen die Vorhersage für Himmelfahrt (Folgetag)</b></p> <ul style="list-style-type: none"> <li>• Sie planen mit Ihrer Familie einen Ausflug in den Waldzoo (roter Punkt) – schließlich ist Feiertag!</li> <li>• Zur Sicherheit sehen Sie vorher nochmal in Ihrer DWD-WarnWetter-App nach. Leider soll es durchgehend regnen.</li> <li>• Sie bräuchten nur ein paar Stunden trockenes Wetter, das zeichnet sich aber leider nicht ab. Sie entschließen sich daher lieber zuhause zu bleiben.</li> </ul> <p><b>So war das Wetter an Himmelfahrt tatsächlich:</b></p> <ul style="list-style-type: none"> <li>• Obwohl es immer wieder regnet, scheint zwischendurch viel die Sonne.</li> <li>• Wenn Sie gewusst hätten, dass es zwischendurch immer wieder mal trocken bleibt, hätten Sie ohne Probleme in den Waldzoo gehen können. Aufgrund der Vorhersage sind Sie jedoch zuhause geblieben.</li> </ul> <p><b>Fazit: Entgegen der Vorhersage hat es nicht durchgehend geregnet!</b></p> | <p><b>It's Wednesday: You see the forecast for Ascension Day (the next day)</b></p> <ul style="list-style-type: none"> <li>• You're planning a trip to the forest zoo (red dot) with your family - after all, it's a holiday!</li> <li>• To be safe, you check your DWD WarnWetter app [<i>mobile app by DWD that provides weather warnings and information</i>] again. Unfortunately, it's supposed to rain continuously.</li> <li>• You would only need a few hours of dry weather, but that doesn't seem likely. You decide to stay home instead.</li> </ul> <p><b>This is what the weather was actually like on Ascension Day:</b></p> <ul style="list-style-type: none"> <li>• Although it rains repeatedly, the sun shines a lot in between.</li> <li>• If you had known that it would be dry again from time to time, you could have gone to the forest zoo without any problems. However, due to the forecast, you stayed home.</li> </ul> <p><b>Conclusion: Contrary to the forecast, it didn't rain continuously!</b></p> |
| <p>Case H</p> <p>- A persistent rainfall event that was forecast to be intermittent (i.e., with noticeable breaks of dry weather).</p>    |                                                                                      | <p><b>Es ist Freitag: Sie sehen die Vorhersage für Samstag (Folgetag)</b></p> <ul style="list-style-type: none"> <li>• Sie planen eine Wanderung im Taunus (roter Punkt).</li> <li>• Für den Samstag ist starker Regen angesagt, der am Nachmittag für einige Stunden aufhören soll. Während der Regenpause ist heiteres Wetter vorhergesagt.</li> <li>• Um den Tag dennoch draußen verbringen zu können, verkürzen Sie Ihre Tour und verlegen den Start auf den Nachmittag.</li> </ul>                                                                                                                                                                                                                                                                                                                                                                                                                                                                                                                            | <p><b>It's Friday: You are looking at the forecast for Saturday (the next day)</b></p> <ul style="list-style-type: none"> <li>• You're planning a hike in the Taunus Mountains (red dot).</li> <li>• Heavy rain is predicted for Saturday, which should stop for a few hours in the afternoon. During the rain break, fair weather is predicted.</li> <li>• To still be able to spend the day outside, you shorten your tour and reschedule the start for the afternoon.</li> </ul>                                                                                                                                                                                                                                                                                                                                                                                                                                                                                                                                                 |

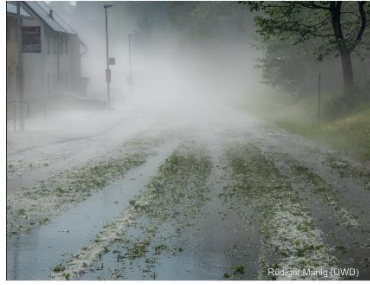

**So war das Wetter am Samstagnachmittag tatsächlich**

- Obwohl Sie auf den Nachmittag gewartet haben, hat sich das Wetter nicht gebessert. Der Regen hält bis in die Abendstunden an. Zudem kommt zeitweise noch leichter Hagel dazu.
- Das Foto [...] zeigt Ihre Aussicht vom Auto.
- Auf dem Großen Feldberg im Taunus werden an diesem Tag 60 mm Regen gemessen.

**Fazit: Entgegen der Vorhersage hat es durchgehend geregnet!**

**This is what the weather was actually like on Saturday afternoon:**

- Although you waited until the afternoon, the weather didn't improve. It continues to rain into the evening hours. Additionally, there's occasional light hail.
- The photo [...] shows your view from the car.
- On the Great Feldberg Mountain in the Taunus Mountains, 60 mm of rain is measured on this day.

**Conclusion: Contrary to the forecast, it rained continuously!**
